# Supplementary material for: Nitric oxide dioxygenation (NOD) reactions of CoIII-peroxo and NiIII-peroxo complexes: NODversusNO activation
Source: Royal Society of Chemistry journal article supplement (doi:10.1039/d0qi01023e), 2020-01-01
Supplement: d0qi01023e1.pdf [file d0qi01023e1.pdf]

## Supporting Information

### **Mimicking the Nitric Oxide Dioxygenation (NOD) Reaction Cycle: A Comparative Study of “NOD Versus Dioxygen /or Nitric Oxide Activation”**

Mahesh Yenuganti,<sup>||†</sup> Sandip Das,<sup>||†</sup> Kulbir,<sup>||†</sup> Somnath Ghosh,<sup>†</sup> Prabhakar Bhardwaj,<sup>†</sup> Sonali  
Shivaji Pawar,<sup>†</sup> Subhas Chandra Sahoo<sup>‡</sup> Pankaj Kumar<sup>\*†</sup>

<sup>†</sup>Department of Chemistry, Indian Institute of Science Education and Research (IISER),  
Tirupati 517507, India

<sup>‡</sup>Department of Chemistry, Punjab University, Punjab, Chandigarh, India

\* To whom correspondence should be addressed.

E-mail: [pankaj@iisertirupati.ac.in](mailto:pankaj@iisertirupati.ac.in)

## Table of Contents

### Experimental Section

|                                                                                                                             |     |
|-----------------------------------------------------------------------------------------------------------------------------|-----|
| Materials and Instrumentation                                                                                               | S4  |
| Nitric Oxide Preparation and Purification                                                                                   | S4  |
| Single-Crystal XRD Studies                                                                                                  | S5  |
| Reactivity Studies                                                                                                          | S5  |
| FT-IR Spectroscopy and $^{18}\text{O}$ -labeling Experiments                                                                | S6  |
| NOD Reaction and $^{18}\text{O}$ -labeling Experiments by ESI-Mass Spectrometry                                             | S6  |
| Detection of Peroxynitrite intermediate ( $\bullet\text{NO}_2$ radical trapping experiment).                                | S7  |
| Control Experiments on 2,4-DTBP                                                                                             | S7  |
| Qualitative and quantitative estimation of $\text{NO}_2^-$ and $\text{NO}_3^-$ by Griess reagent test                       | S8  |
| Nitrate estimation by modified Griess reagent.                                                                              | S8  |
| Nitrite estimation by Griess reagent                                                                                        | S9  |
| NOD reaction <b>1</b> {Formation of $[(12\text{-TMC})\text{Ni}^{\text{II}}(\text{NO}_3^-)] + (\mathbf{3}\text{-NO}_3^-)$ }. | S10 |
| NOD reaction <b>2</b> {Formation of $[(12\text{-TMC})\text{Co}^{\text{II}}(\text{NO}_2^-)] + (\mathbf{4}\text{-NO}_2^-)$ }. | S10 |
| Synthesis of $[(12\text{-TMC})\text{Co}^{\text{II}}(\text{NO}_2^-)](\text{ClO}_4)$                                          | S11 |
| Magnetic moment calculation and determination of number of unpaired electrons in complex <b>3</b>                           | S12 |
| References                                                                                                                  | S13 |
| Table T1. Crystallographic data for <b>3</b> and <b>4</b>                                                                   | S15 |
| Table T2. Selected bond lengths ( $\text{\AA}$ ) and bond angles ( $^\circ$ ) for <b>3</b> and <b>4</b>                     | S16 |
| Fig. S1                                                                                                                     | S17 |
| Fig. S2                                                                                                                     | S18 |
| Fig. S3                                                                                                                     | S19 |
| Fig. S4                                                                                                                     | S20 |
| Fig. S5                                                                                                                     | S21 |
| Fig. S6                                                                                                                     | S22 |
| Fig. S7                                                                                                                     | S23 |
| Fig. S8                                                                                                                     | S24 |
| Fig. S9                                                                                                                     | S25 |
| Fig. S10                                                                                                                    | S26 |
| Fig. S11                                                                                                                    | S27 |
| Fig. S12                                                                                                                    | S28 |
| Fig. S13                                                                                                                    | S29 |
| Fig. S14                                                                                                                    | S30 |
| Fig. S15                                                                                                                    | S31 |
| Fig. S16                                                                                                                    | S32 |
| Fig. S17                                                                                                                    | S33 |
| Fig. S18                                                                                                                    | S34 |
| Fig. S19                                                                                                                    | S35 |
| Fig. S20                                                                                                                    | S36 |

|          |     |
|----------|-----|
| Fig. S21 | S37 |
| Fig. S22 | S38 |
| Fig. S23 | S39 |
| Fig. S24 | S40 |
| Fig. S25 | S41 |
| Fig. S26 | S42 |

**Materials.** All reagents and solvents obtained from commercial sources (Sigma Aldrich Chemical Co. and Tokyo Chemical Industry) were of the best available purity and used without further purification unless otherwise indicated. Solvents were dried according to reported literature and distilled under inert atmosphere before use.<sup>S1</sup> H<sub>2</sub><sup>18</sup>O<sub>2</sub> (90.% <sup>18</sup>O-enriched) was purchased from ICON Services Inc. (Summit, NJ, USA). The 12-TMC ligand was prepared by reacting excess amounts of formaldehyde and formic acid with 1,4,7,10-tetraazacyclododecane as reported previously.<sup>S2</sup>

**Instrumentation.** UV-vis spectra were recorded on a Hewlett-Packard 8453 diode array spectrometer equipped with a thermostat cell holder (UNISOKU Scientific Instruments) designed for low-temperature experiments. FT-IR spectra in solid form were recorded on the Bruker-Alpha Eco-ATR FTIR spectrometer using the standard KBr disk method. <sup>1</sup>H-NMR spectra were measured with a Bruker model Ascend 400 FT-NMR spectrometer. Electrospray ionization mass spectra (ESI-MS) were recorded on an Agilent Mass Spectrometer (6200 series TOF/6500 series Q-TOF B.08.00), by infusing samples directly into the source using a manual method. The spray voltage was set at 4.2 kV and the capillary temperature at 80 °C. EPR spectral data were collected using an X-band Bruker EMX-plus spectrometer equipped with a dual-mode cavity at 100 K. The GC-MS analysis was recorded on an Agilent 7890B GC system equipped with a 5977B MSD Mass analyzer.

**Nitric Oxide Preparation and Purification.** Nitric oxide (NO) was prepared and purified by following a detailed procedure, as shown in Fig. S1. First, NO gas was prepared by the reaction of NaNO<sub>2</sub> with H<sub>2</sub>SO<sub>4</sub> under an Argon (Ar) atmosphere and then passed through two different types of columns. Then NO gas passes through a column filled with NaOH beads to remove higher nitrogen oxides impurities. After that, the gas pass through a set of two columns filled with NaOH beads molecular sieves to remove the minor amount of remaining higher nitrogen oxides and moisture impurities. The highly purified NO gas was then collected

in a vacuum Schlenk flask fitted with a rubber septum (free from oxygen; after several cycles of vacuum and Ar purging). High pressure NO gas (with pressure >1 atmosphere; the septum bulges outward due to high pressures) then passed through an Ar saturated (oxygen-free) and dry Acetonitrile (CH<sub>3</sub>CN) solution for 15 minutes. The concentration of NO in the NO saturated CH<sub>3</sub>CN solution is ~14 mM.<sup>S3</sup>

**Single-Crystal XRD Studies.** The single crystals for **3**(NO<sub>3</sub>)-(ClO<sub>4</sub>) and **4**(NO<sub>2</sub>)-(ClO<sub>4</sub>) were obtained by slow diffusion of Et<sub>2</sub>O into their CH<sub>3</sub>CN solutions at -30 °C. Crystals were mounted on Hampton cryoloops. All geometric and intensity data for the crystals were collected using a Super-Nova (Mo) X-ray diffractometer equipped with a micro-focus sealed X-ray tube Mo-K $\alpha$  ( $\lambda$  = 0.71073 Å) X-ray source and HyPix3000 (CCD plate) detector of with increasing  $\omega$  (width of 0.3 per frame) at a scan speed of either 5 or 10 s/frame. The CrysAlisPro software was used for data acquisition and data extraction. Using Olex2<sup>S4</sup>, the structure was solved with the SIR2004<sup>S5</sup> structure solution program using Direct Methods and refined with the ShelXL<sup>S6</sup> refinement package using Least Squares minimization. All non-hydrogen atoms were refined with anisotropic thermal parameters. Few anions mainly ClO<sub>4</sub> ions were found to be highly disordered, and appropriate disordered model applied (Figure S16 and S17). Detail crystallographic data and structural refinement parameters are summarized in Table T1 – T2. CCDC 1997187 (**3**) and 1997186 (**4**), contains the supplementary crystallographic data for this paper. Crystallographic data can be obtained free of charge from the Cambridge Crystallographic Data Centre (CCDC) via [www.ccdc.cam.ac.uk/data\\_request/cif](http://www.ccdc.cam.ac.uk/data_request/cif) (or from the Cambridge Crystallographic Data Centre, 12, Union Road, Cambridge CB2 1EZ, UK; fax: (+44) 1223-336-033; or [deposit@ccdc.cam.ac.uk](mailto:deposit@ccdc.cam.ac.uk)).

**Reactivity Studies.** All UV-vis spectral measurements were run in a UV cuvette in CH<sub>3</sub>CN solutions under Ar at different tempratures. All kinetic reactions were run at least three times, and the data reported here are the average outcome for these reactions. We have performed all

the reactions in the degassed solutions under Ar to avoid the interaction/reaction of dioxygen with nitric oxide. Formation of complexes **3** and **4**, in the NOD reactions of **1** and **2** (respectively), were identified by comparing with the authentic samples, and product yields were determined by comparison against standard curves prepared with authentic samples.<sup>S7-S10</sup>

**FT-IR Spectroscopy and <sup>18</sup>O-labeling Experiments.** We have recorded the FT-IR spectra of different complexes in their solid form as KBr pellets to follow the source of oxygen in the NOD products. All the spectra were recorded for the isolated products after the completion of the reaction at RT. The IR spectra of **3** showed a characteristic peak at 1385 cm<sup>-1</sup> for nitrate (<sup>14</sup>N<sup>16</sup>O<sub>3</sub><sup>-</sup>), which shifted to 1335 cm<sup>-1</sup> when prepared in the reaction of **1**-(<sup>18</sup>O<sub>2</sub><sup>2-</sup>) with <sup>14</sup>NO. The change in the IR stretching frequency of nickel bound nitrate ( $\Delta = 50$  cm<sup>-1</sup>) confirmed clearly that the increase in the reduced mass of oxygen atom (<sup>16</sup>O to <sup>18</sup>O) by four amu is responsible for the decrease in the stretching frequency of nitrate (**3**-(<sup>18</sup>O<sub>2</sub>N<sup>16</sup>O<sup>-</sup>)) functional group (SI, Figure S2). We observed the similar spectral changes when the IR spectra of the NOD reaction product of **2**-(<sup>16</sup>O<sub>2</sub><sup>2-</sup>). The IR spectra of complex **4**-(<sup>16</sup>ON<sup>16</sup>O) showed a characteristic nitrite stretching frequency at 1271 cm<sup>-1</sup>, which shifted to 1240 cm<sup>-1</sup> (<sup>18</sup>ON<sup>16</sup>O<sup>-</sup>) when O<sub>2</sub><sup>2-</sup> moiety of **2** was prepared with <sup>18</sup>O-labeled H<sub>2</sub><sup>18</sup>O<sub>2</sub> (SI, Figure S7).

**NOD Reaction and <sup>18</sup>O-labeling Experiments by ESI-Mass Spectrometry.** We have recorded the ESI mass spectra for the NOD products, after completion of the reaction, in CH<sub>3</sub>CN and at RT. To identify and establish the source of oxygen, complexes **1** and **2** having <sup>18</sup>O-labeled O<sub>2</sub><sup>2-</sup> moiety ([ (12-TMC)Ni<sup>III</sup>(<sup>18</sup>O<sub>2</sub><sup>2-</sup>) ]<sup>+</sup> and [ (12-TMC)Co<sup>III</sup>(<sup>18</sup>O<sub>2</sub><sup>2-</sup>) ]<sup>+</sup>), were reacted with one fold NO in CH<sub>3</sub>CN under Ar at 233 K. For this experiment, two different schlenk tube (25 mL) equipped with CH<sub>3</sub>CN solution of **1** and **2** (0.5 mM / 10 mL) sealed with a rubber septum was reacted with one fold NO under an Ar atmosphere. The reaction mixtures were kept for one hour, and then ESI mass spectra of the solutions in CH<sub>3</sub>CN were recorded.

**Detection of Peroxynitrite intermediate ( $\bullet\text{NO}_2$  radical trapping experiment).** To confirm the formation of  $\text{Ni}^{\text{II}}\text{-PN}$ , we have performed the phenol ring nitration test by trapping  $\bullet\text{NO}_2$  (formed by the homolysis of  $\text{ONO-O}^-$  moiety of  $\text{M-PN}$  intermediate) using 2,4-di-*tert*-butyl phenol (2,4-DTBP). In this regard, first, we have reacted **1** (1.0 mM) with one equivalent of NO in the presence of 2,4-DTBP (5.0 mM) in  $\text{CH}_3\text{CN}$  at 233 K under Ar. The reaction mixture was kept for one hour at RT and then analyzed by GC-MS and HPLC for qualitative and quantitative estimation against the standard plots of various compounds. In this experiment, we have observed the formation of  $\text{NO}_2\text{-2,4-DTBP}$  with 2,4-DTBP-D (SI, Figure S14), suggesting the formation of  $\text{Ni}^{\text{II}}\text{-PN}$  intermediate and homolysis of  $\text{O-ONO}^-$  moiety to form  $\bullet\text{NO}_2$ , which is responsible for the formation of various products from 2,4-DTBP. The amount of  $\text{NO}_2\text{-2,4-DTBP}$  formed in the reaction was found to be  $\sim 60 (\pm 2)\%$  and  $\sim 10 (\pm 2) \%$  2,4-DTBP-D in the reaction mixture, because a small amount of  $\text{Ni}^{\text{II}}\text{-PN}$  decomposes to  $\text{Ni}^{\text{II}}\text{-NO}_3^-$  due to the isomerization of  $\text{ONOO}^-$  to  $\text{NO}_3^-$ . Also, we have identified the formation of proposed  $\text{Co}^{\text{II}}\text{-PN}$  intermediate by phenol ring nitration test using 2,4-DTBP. In this trapping experiment also, we had observed the formation of PN driven products ( $\text{NO}_2\text{-2,4-DTBP}$  and 2,4-DTBP-D) when **2** was reacted with one fold NO in the presence of 2,4-DTBP. In this regard, we have reacted **2** (1.0 mM) with NO (1.0 mM) in the presence of 2,4-DTBP (5.0 mM) in  $\text{CH}_3\text{CN}$  at 258 K under Ar. The reaction mixture was then kept for one hour at RT and then analyzed and quantified by GC-MS and HPLC against the standard plots of all the compounds. In this reaction, we observed the formation of the  $\text{NO}_2\text{-2,4-DTBP}$   $\{\sim 45 (\pm 2) \%\}$  and dimerized product, 2,4-DTBP-D,  $\{\sim 15 (\pm 2)\% \}$  product mixture. As known from the literature, PN reaction with 2,4-DTBP generates the  $\text{NO}_2\text{-2,4-DTBP}$  and hence confirm the putative PN intermediate formation in the reaction of both the complexes (**1** & **2**) with NO.

**Control Experiments on 2,4-DTBP:** In order to confirm the proposed  $[\text{Ni-PN}]^+$  intermediate, in the NOD reaction of **1**, we have explored the phenol ring nitrosation in various

experimental conditions. As already confirmed, *indirectly*, a metal-PN has been well characterized/explored by **PHENOL-RING-NITROSATION TEST** using 2,4-DTBP (wide *supra*), and a vast literature is available on the same chemistry. In case of NOD reaction of **1**, UV-Visible spectral evidence showed a new band, proposed to be  $\text{Ni}^{2+}$ -PN, before the generation of  $\text{Ni}^{2+}\text{NO}_3^-$ . Furthermore, to support our assumption, we have performed/included the following control experiments

(a) Added 2,4,-DTBP (5.0 mM) after the completion of NOD reaction of **1** (1.0 mM).

(b) **1** (1.0 mM) + 2,4,-DTBP (5.0 mM) without addition of NO

(c) 2,4,-DTBP (5.0 mM) + NO

In these experiments (a, b & c), we did not observe the ring-nitration product ( $\text{NO}_2$ -2,4-DTBP), supporting our proposition Ni-PN intermediate in the NOD reaction of complex **1**. The product analysis using GC only showed the 2-4-DTBP and a very small amount of 2,4-DTBP-D (0.5 to 1 %) in case of experiment b. While in experiment a and c, we only observed 2,4-DTBP, no  $\text{NO}_2$ -2,4-DTBP in any of these control experiments.

**Qualitative and quantitative estimation of  $\text{NO}_2^-$  and  $\text{NO}_3^-$  by Griess reagent test.** Griess reagent test was performed for qualitative and quantitative estimation of  $\text{NO}_3^-$  and  $\text{NO}_2^-$  in the reaction of **1** and **2** with one fold NO, respectively. Griess reagent is known to detect and analyze the  $\text{NO}_2^-$  ion by the formation of an azo dye (red-pink color). But, it is not active towards  $\text{NO}_3^-$  ions; however, upon addition of  $\text{VCl}_3$  to Griess reagent (modified Griess reagent), it shows the formation of azo dye (red-pink color). Therefore, Griess reagent can easily distinguish between  $\text{NO}_2^-$  and  $\text{NO}_2^-$  and can also be quantified following the UV-vis calibration plot.

**Nitrate estimation by modified Griess reagent.** Complex **1** (0.5 mM, 10 mL) was reacted with one equivalent of NO under the Ar atmosphere at  $-40^\circ\text{C}$ . The color of the solution was changed from green to light blue. After the completion of the reaction, the reaction mixture



was kept at room temperature for about 30 minutes and then dried on the rotary evaporator. We have added water (5.0 mL) to the dried product, and then a solution of Na<sub>2</sub>S (5.0 mM, 5.0 mL) was added, and the reaction mixture was kept for 30 minutes. Nickel precipitates as NiS and separated by filtration. The organic component of the reaction mixture was separated from the aqueous layer using CHCl<sub>3</sub>. We have diluted the aqueous layer up to 10 mL. To prepare the sample for quantification of NO<sub>3</sub><sup>-</sup>, 25 µL of this solution was added to a sample vial containing 1.0 mL of freshly prepared modified Griess reagent and then diluted to 2.5 mL by adding H<sub>2</sub>O. The modified Griess reagent was prepared by mixing sulphanilic acid (0.2%), naphthylethylenediamine dihydrochloride (0.01%), and VCl<sub>3</sub> (0.8 % in 1M HCl) in aqueous solution. We did not observe any color change immediately, but after keeping for overnight, the color of the solution was changed to violate-pink. We have compared the UV-vis spectra of this solution with a calibration plot prepared by employing authentic NaNO<sub>3</sub> solutions (SI, Figure S13). The yields of nitrate determined by using modified Griess reagent in the reaction of **1** with NO was 85 ± 4 %.

To obtain the calibration curve, the stock solutions of NaNO<sub>3</sub> in various concentration (0, 0.20, 0.40, 0.60, 0.80, 1.00, 1.20, 1.40, 1.60, 1.80, 2.00 mM) were prepared and 25 µL of each stock solution was added to a sample vial containing 1.0 mL of fresh prepared modified Griess reagent and then diluted to 2.5 mL by adding H<sub>2</sub>O. We recorded UV-vis spectra for each standard solution and a calibration plot was prepared with varying concentrations of nitrate (0, 2.0, 4.0, 6.0, 8.0, 10, 12, 14, 16, 18, 20 µM) and corresponding  $\lambda_{max}$  at 547 nm (SI, Figure S13b).

**Nitrite estimation by Griess reagent.** The amount of NO<sub>2</sub><sup>-</sup> formed in the reaction of **2** (0.5 mM) and NO was determined by using Griess reagent and following the same procedure as explained for NO<sub>3</sub><sup>-</sup> (vide supra). The Griess reagent was prepared by mixing sulphanilic acid (2.0%), naphthyl ethylenediamine dihydrochloride (0.2%) in aqueous phosphoric acid (5.0%).

We observed the immediate color change as 25  $\mu\text{L}$  of the extracted aqueous solution (10 mL) was added to a sample vial containing 1.0 mL of Griess reagent. We have compared the UV-vis spectra of this solution with a calibration plot prepared by employing authentic  $\text{NaNO}_2$  solutions (SI, Figure S13). The yields of nitrite determined by using Griess reagent in the reaction of **1** with NO was  $90 \pm 2 \%$ .

To obtain the calibration curve, the stock solutions of  $\text{NaNO}_2$  in various concentration (0, 0.25, 0.50, 0.75, 1.00, 1.25, 1.50, 1.75, 2.00, 2.25, 2.50 mM) were prepared and 25  $\mu\text{L}$  of each stock solution was added to a sample vial containing 1.0 mL of fresh prepared Griess reagent and then diluted to 2.5 mL by adding  $\text{H}_2\text{O}$ . We recorded UV-vis spectra for each standard solution and a calibration plot was prepared with varying concentrations of nitrite (0, 2.5, 5.0, 7.5, 10, 12.5, 15, 17.5, 20, 22.5, 25  $\mu\text{M}$ ) and corresponding  $\lambda_{\text{max}}$  at 547 nm (SI, Figure S13b).

**NOD reaction 1 {Formation of  $[(12\text{-TMC})\text{Ni}^{\text{II}}(\text{NO}_3^-)]^+ (3\text{-NO}_3^-)$ }. Complex **1** was reacted with an equimolar amount of NO in  $\text{CH}_3\text{CN}$  under Ar to determine the product of the NOD reaction. To confirm the NOD reaction product, complex **1** (84 mg, 0.2 mmol) was reacted with one equivalent of NO in  $\text{CH}_3\text{CN}$  at 233 K under an Ar atmosphere. Upon reaction with NO, the color of the reaction mixture changes from light green to light blue, indicating the formation of a new product (**3**). The reaction mixture further stirred for 30 minutes at 273 K under the Ar atmosphere. Excess diethyl ether was added to yield light blue powder, which was collected by filtration and further washed with diethyl ether and dried under vacuum. Further the blue powder was dissolved in ACN and layered with diethyl ether to obtain a good deep blue colored crystal. Yield: 85 mg (95 %). UV:  $\lambda_{\text{max}} = 370 \text{ nm}$ . FT-IR (KBr pellet): 2925, 1385, 1089  $\text{cm}^{-1}$ . Mass ( $m/z$ ): Calcd: 348.1, Found: 348.1. Anal. Calcd. For  $\text{C}_{12}\text{H}_{28}\text{ClN}_5\text{NiO}_7$ : C, 32.13; H, 6.29; N, 15.61; Found : C, 32.28; H, 6.31; N, 15.56.  $^1\text{H}$  NMR ( $\text{CD}_3\text{CN}$ ):  $\sim 113$  (6H,  $-\text{CH}_3$ ),  $\sim 124$  (6H,  $-\text{CH}_3$ ),  $\sim 133$  (8H,  $-\text{CH}_2$ ),  $\sim 142$  (8H,  $-\text{CH}_2$ ). X-ray crystallography suitable crystals were obtained by vapor diffusion of  $\text{Et}_2\text{O}$  to a  $\text{CH}_3\text{CN}$  solution of **3** at 253 K.**

**NOD reaction 2 {Formation of [(12-TMC)Co<sup>II</sup>(NO<sub>2</sub><sup>-</sup>)]<sup>+</sup> (4-NO<sub>2</sub><sup>-</sup>)}**. The addition of NO to a solution of **2** resulted in the generation of **4**. The characteristic UV-Vis absorption bands of **2** ( $\lambda_{\text{max}} = 350 \text{ nm}$  and  $560 \text{ nm}$ ) changed to a new band ( $\lambda_{\text{max}} = 535 \text{ nm}$ ), which corresponds to **4**, within 50 minutes in CH<sub>3</sub>CN at 233 K under an Ar atmosphere. Further, for various spectral characterization, we have isolated the end product (**4**) of the reaction of **2** with an equimolar amount of NO under the given reaction conditions. Complex **2** (85 mg, 0.2 mmol) reacted with an equimolar amount of NO at 253 K in CH<sub>3</sub>CN under the Ar atmosphere. The color of the reaction mixture changes from purple to light pink within 20 minutes upon the addition of NO. The reaction mixture further stirred for an additional 30 minutes at 253 K and then warmed to RT and stirred for an additional 30 minutes under Ar atmosphere. The complex was dried under vacuum and washed with diethyl ether several times and again dried under vacuum to afford light pink powder. The FT-IR spectrum of **4** showed a characteristic peak for Co<sup>II</sup>-bound NO<sub>2</sub><sup>-</sup> at  $1271 \text{ cm}^{-1}$ , which shifted to  $1240 \text{ cm}^{-1}$  when exchanged with <sup>18</sup>O-labeled-**2**, i.e., [(12TMC)Co<sup>III</sup>(<sup>18</sup>O<sub>2</sub><sup>2-</sup>)]<sup>+</sup> (Figure S12). The ESI-MS spectrum of the **4** exhibited a prominent peak at  $m/z$  333.16, [(12TMC)Co<sup>II</sup>(N<sup>16</sup>O<sub>2</sub><sup>-</sup>)]<sup>+</sup> (calcd  $m/z$  333.16). However, this peak shifted to  $m/z$  335.16, [(12TMC)Co<sup>II</sup>(<sup>18</sup>ON<sup>16</sup>O<sup>-</sup>)]<sup>+</sup> (calcd  $m/z$  335.16) (Figure S13) when the reaction was performed with <sup>18</sup>O-labeled **2**, i.e., [(12TMC)Co<sup>III</sup>(<sup>18</sup>O<sub>2</sub><sup>2-</sup>)]<sup>+</sup>; demonstrating clearly that the nitrite (<sup>16</sup>ON<sup>18</sup>O<sup>-</sup>) ligand in **4** is derived from O<sub>2</sub><sup>2-</sup> moiety of **2**. Yield: 75 mg (85 %). UV:  $\lambda_{\text{max}} = 535 \text{ nm}$  ( $\epsilon = 24 \text{ M}^{-1} \text{ cm}^{-1}$ ). FT-IR (KBr pellet): 2925, 1271, 1084, 755  $\text{cm}^{-1}$ . Mass ( $m/z$ ): Calcd: 333.1, Found: 333.1. Crystals suitable for X-ray crystallography were obtained on keeping the acetonitrile solution of **4** layered with diethyl ether at 253 K for several days.

**Synthesis of [(12-TMC)Co<sup>II</sup>(NO<sub>2</sub><sup>-</sup>)](ClO<sub>4</sub>).** To a 20 ml CH<sub>3</sub>CN solution of [(12-TMC)Co<sup>II</sup>(CH<sub>3</sub>CN)](ClO<sub>4</sub>)<sub>2</sub> (502 mg, 1 mmol), 0.3 mL aqueous solution of NaNO<sub>2</sub> (69 mg, 1 mmol) was added slowly with constant stirring. The color of the reaction mixture changed from wine red to light pink over 5 min after the addition of NaNO<sub>2</sub>. The mixture was stirred for one

hour at RT. The volume of the reaction mixture was then decreased to 10 mL over a rotary vacuum and then layered with diethyl ether and kept for crystallization at 253 K. Yield: 400 mg (~ 95 %). UV:  $\lambda_{max} = 535 \text{ nm}$  ( $\epsilon = 24 \text{ M}^{-1} \text{ cm}^{-1}$ ). FT-IR (KBr pellet): 2925, 1271, 1089, 755  $\text{cm}^{-1}$ . Mass ( $m/z$ ): Calcd: 333.1, Found: 333.1.

**Magnetic moment calculation and determination of number of unpaired electrons in complex 3:** Evans' method of  $^1\text{H}$ -NMR was performed to determine the number of unpaired electrons (spin state) in complex **3** at room temperature<sup>S11-S13</sup>. A WILMAD® coaxial insert (with a sealed capillary) tube containing the only  $\text{CD}_3\text{CN}$  solvent (with 1.0% TMS) was inserted into the normal NMR tubes containing the complex **3** (4.0 mM, with 0.1% TMS). We have calculated the chemical shift value of the TMS peak in the presence of the complex **3** with respect to that of the TMS peak in the outer NMR tube. The magnetic moment was calculated using the given equation,

$$\mu_{eff} = 0.0618(\Delta\nu T / 2fM)^{1/2}$$

$$\mu_{eff} = 0.0618 * (26.76 * 298 / 2 * 400 * 0.004)^{1/2}$$

$$\mu_{eff} = 3.08 \text{ BM}$$

Where  $f$  = oscillator frequency (MHz) of the superconducting spectrometer,  $T$  = absolute temperature,  $M$  = molar concentration of the complex **3**, and  $\nu$  = difference in frequency (Hz) between the two TMS signals<sup>S13</sup>. The calculated magnetic moment of complex **3** was determined to be 3.08 BM in  $\text{CD}_3\text{CN}$  at RT, suggesting 2 unpaired electrons in  $\text{Ni}^{2+}$  centre of complex **3**.

## References

- S1. Armarego, W. L. F.; Chai, C. L. L. *Purification of Laboratory Chemicals*, 6th ed.; Pergamon Press: Oxford, **2009**.
- S2. Puthiyaveetil Yoosaf, M. A.; Ghosh, S.; Narayan, Y.; Yadav, M.; Sahoo, S. C.; Kumar, P., Finding a new pathway for acid-induced nitrite reduction reaction: formation of nitric oxide with hydrogen peroxide. *Dalton Transactions* **2019**, 48, 13916-13920.
- S3. Young, C. L. *Solubility Data Series Val. 8 Oxides of Nitrogen*, International Union of Pure and Applied Chemistry (IUPAC), 1981.
- S4. Dolomanov, O. V.; Bourhis, L. J.; Gildea, R. J.; Howard, J. A. K.; Puschmann, H. OLEX2: a Complete Structure Solution, Refinement and Analysis Program. *J. Appl. Cryst.* **2009**, 42, 339–341.
- S5. Burla, M. C.; Caliandro, R.; Camalli, M. C., B.; Cascarano, G. L.; De Caro, L.; Giacovazzo, C.; Polidori, G.; Siliqi, D.; Spagna, R. IL MILIONE: A Suite of Computer Programs for Crystal Structure Solution of Proteins. *J. Appl. Cryst.* **2007**, 40, 609–613.
- S6. G. M. Sheldrick. Crystal Structure Refinement with SHELXL. *Acta Cryst.* **2015**, C71, 3–8.
- S7. Cho, J.; Sarangi, R.; Kang, H. Y.; Lee, J. Y.; Kubo, M.; Ogura, T.; Solomon, E. I.; Nam, W., Synthesis, structural, and spectroscopic characterization and reactivities of mononuclear cobalt(III)-peroxo complexes. *J. Am. Chem. Soc.* **2010**, 132 (47), 16977-86.
- S8. Cho, J.; Sarangi, R.; Annaraj, J.; Kim, S. Y.; Kubo, M.; Ogura, T.; Solomon, E. I.; Nam, W., Geometric and electronic structure and reactivity of a mononuclear ‘side-on’ nickel(iii)–peroxo complex. *Nature Chem.* **2009**, 1 (7), 568-572.
- S9. Kumar, P.; Lee, Y. M.; Park, Y. J.; Siegler, M. A.; Karlin, K. D.; Nam, W., Reactions of Co(III)-nitrosyl complexes with superoxide and their mechanistic insights. *J Am Chem Soc* **2015**, 137 (13), 4284-7.
- S10. Puthiyaveetil Yoosaf, M. A.; Ghosh, S.; Narayan, Y.; Yadav, M.; Sahoo, S. C.; Kumar, P., Finding a new pathway for acid-induced nitrite reduction reaction: formation of nitric oxide with hydrogen peroxide. *Dalton Trans.* **2019**, 48 (37), 13916-13920.
- S11. Evans, D. F. The determination of the paramagnetic susceptibility of substances in

- solution by nuclear magnetic resonance. J. Chem. Soc. 2003-2005 (1959).
- S12. Löllinger, J. & Scheffold, R. Paramagnetic moment measurements by nmr. A micro technique. J. Chem. Edu. 646-647 (1972).
- S13. Evans, D. F. & Jakubovic, D. A. Water-soluble hexadentate Schiff-base ligands as sequestering agents for iron(III) and gallium(III). J. Chem. Soc. Dalton Trans. 2927-2933 (1988).

**Table T1** Crystallographic data for **3** and **4**.

|                                                     | <b>3</b>                                                          | <b>4</b>                                                          |
|-----------------------------------------------------|-------------------------------------------------------------------|-------------------------------------------------------------------|
| Chemical formula                                    | C <sub>12</sub> H <sub>28</sub> ClN <sub>5</sub> NiO <sub>7</sub> | C <sub>12</sub> H <sub>28</sub> ClCoN <sub>5</sub> O <sub>6</sub> |
| Formula weight                                      | 450.55                                                            | 432.77                                                            |
| Wavelength /Å                                       | 0.71073                                                           | 0.71073                                                           |
| Crystal system                                      | orthorhombic                                                      | monoclinic                                                        |
| Space group                                         | <i>Pnma</i>                                                       | <i>P2<sub>1</sub></i>                                             |
| <i>T</i> , K                                        | 293(2)                                                            | 293(2)                                                            |
| <i>a</i> , Å                                        | 13.8307(4)                                                        | 8.1078(2)                                                         |
| <i>b</i> , Å                                        | 9.6928(2)                                                         | 15.0999(3)                                                        |
| <i>c</i> , Å                                        | 14.1541(4)                                                        | 8.1316(2)                                                         |
| $\alpha$ , °                                        | 90                                                                | 90                                                                |
| $\beta$ , °                                         | 90                                                                | 110.722(2)                                                        |
| $\gamma$ , °                                        | 90                                                                | 90                                                                |
| <i>V</i> / Å <sup>3</sup>                           | 1897.47(9)                                                        | 931.12(4)                                                         |
| <i>Z</i>                                            | 4                                                                 | 2                                                                 |
| Calculated density, g/cm <sup>3</sup>               | 1.570                                                             | 1.544                                                             |
| Abs. Coeff. /mm <sup>-1</sup>                       | 1.208                                                             | 1.103                                                             |
| Reflections collected                               | 9087                                                              | 11321                                                             |
| Unique reflections                                  | 2154                                                              | 3659                                                              |
| Refinement method                                   | Least-squares on <i>F</i> <sup>2</sup>                            | Least-squares on <i>F</i> <sup>2</sup>                            |
| Data/restraints/parameters                          | 2154/0/156                                                        | 3659/1/225                                                        |
| Goodness-of-fit on <i>F</i> <sup>2</sup>            | 1.035                                                             | 1.126                                                             |
| Final <i>R</i> indices [ <i>I</i> > 2σ( <i>I</i> )] | <i>R</i> 1 = 0.0408<br>w <i>R</i> 2 = 0.1086                      | <i>R</i> 1 = 0.0777<br>w <i>R</i> 2 = 0.1820                      |
| <i>R</i> indices (all data)                         | <i>R</i> 1 = 0.0485<br>w <i>R</i> 2 = 0.1147                      | <i>R</i> 1 = 0.0791<br>w <i>R</i> 2 = 0.1827                      |

**Table T2** Selected bond lengths (Å) and bond angles (°) for **3** and **4**.

| <b>3</b>  |            | <b>4</b>  |          |
|-----------|------------|-----------|----------|
| Ni1 O1    | 2.1521(19) | Co1 O2    | 2.17(1)  |
| Ni1 O1    | 2.1521(19) | Co1 O1    | 2.15(1)  |
| Ni1 N2    | 2.083(2)   | Co1 N2    | 2.20(1)  |
| Ni1 N1    | 2.125(3)   | Co1 N3    | 2.145(9) |
| Ni1 N3    | 2.129(3)   | Co1 N1    | 2.161(9) |
| Ni1 N2    | 2.083(2)   | Co1 N4    | 2.20(1)  |
| O1 Ni1 O1 | 59.37(10)  | O2 Co1 N1 | 133.6(4) |
| N2 Ni1 O1 | 154.75(8)  | O2 Co1 N2 | 93.5(4)  |
| N2 Ni1 O1 | 95.38(8)   | O2 Co1 N3 | 90.3(4)  |
| N2 Ni1 O1 | 95.38(8)   | O2 Co1 N4 | 128.5(4) |
| N2 Ni1 O1 | 154.75(8)  | O2 Co1 O1 | 57.4(4)  |
| N2 Ni1 N2 | 109.86(12) | N1 Co1 N2 | 80.8(4)  |
| N2 Ni1 N1 | 84.68(7)   | N1 Co1 N3 | 133.2(4) |
| N1 Ni1 O1 | 98.47(9)   | N1 Co1 N4 | 81.1(4)  |
| N1 Ni1 O1 | 98.47(9)   | N1 Co1 O1 | 92.5(4)  |
| N1 Ni1 N3 | 161.02(11) | N2 Co1 N3 | 81.5(4)  |
| N3 Ni1 O1 | 98.00(9)   | N2 Co1 N4 | 134.3(4) |
| N3 Ni1 O1 | 98.00(9)   | N2 Co1 O1 | 131.1(4) |
| N2 Ni1 N1 | 84.68(7)   | N3 Co1 N4 | 81.1(4)  |
| N2 Ni1 N3 | 84.45(7)   | N3 Co1 O1 | 130.7(4) |
| N2 Ni1 N3 | 84.45(7)   | N4 Co1 O1 | 91.2(4)  |



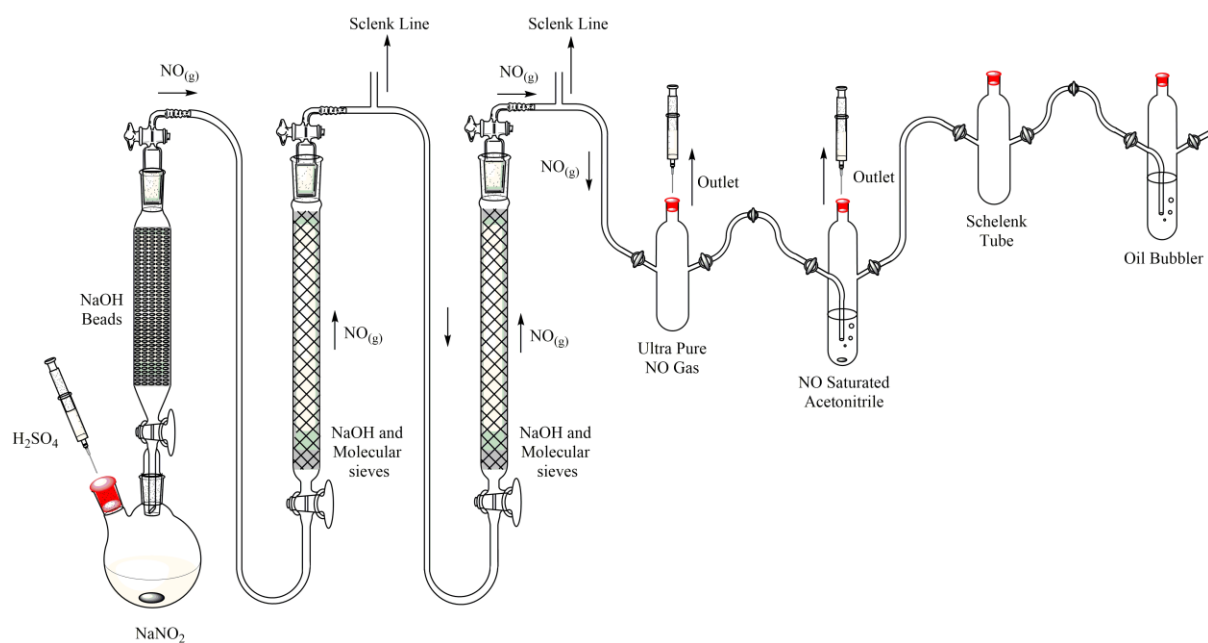

**Figure S1.** Schematic diagram showing the generation and purification setup for NO.

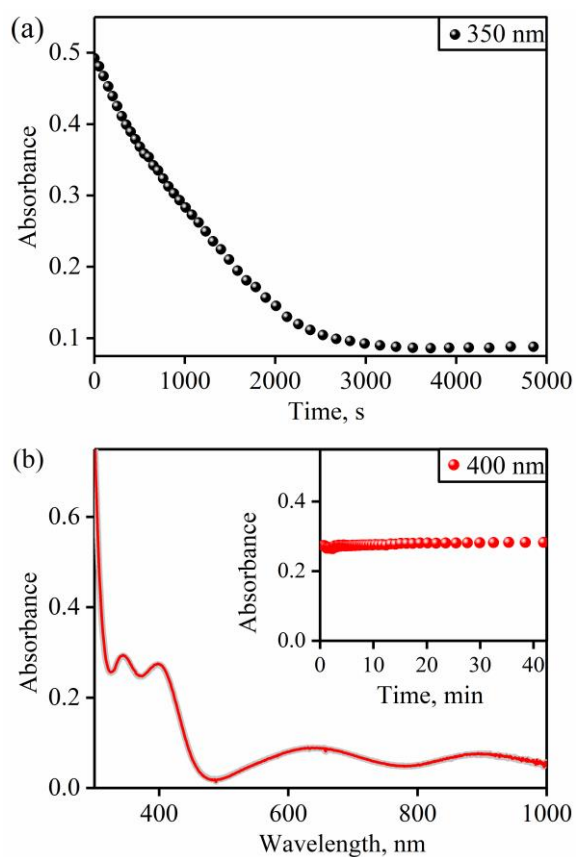

**Figure S2.** (a) Time course of decomposition of intermediate in the reaction of **1** (1 mM) with NO (black circles) monitored at 350 nm in CH<sub>3</sub>CN at 233 K. (b) UV-vis spectra for the natural decay of **1**. The Inset shows the time course of the natural decay of **1** (red circles) monitored at 400 nm in CH<sub>3</sub>CN at 233 K.

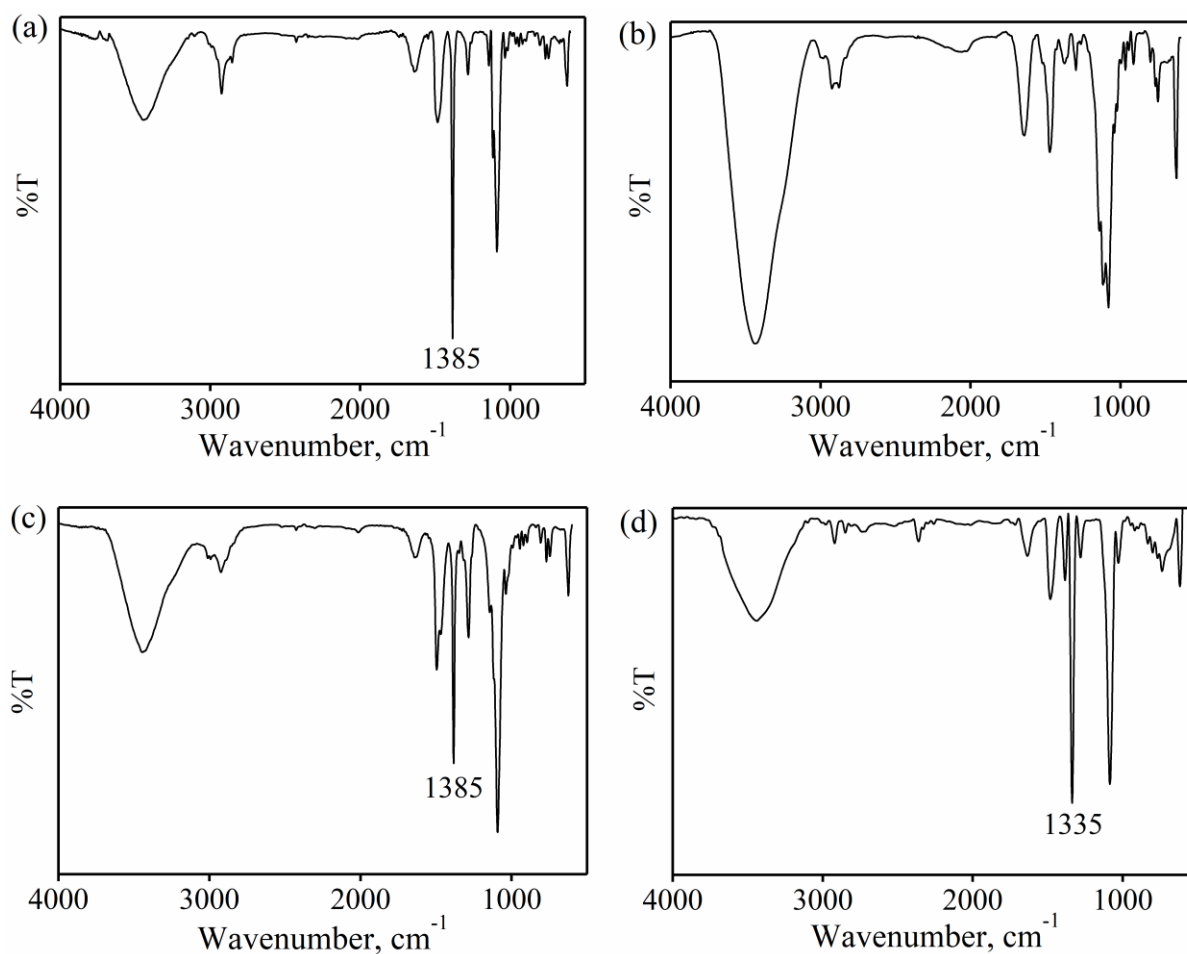

**Figure S3.** FT-IR spectrum of (a) reaction mixture,  $[(12\text{-TMC})\text{Ni}^{\text{III}}(\text{O}_2)]^+ + \text{NO}$ , recorded after completion of reaction in KBr pellet at 298 K. (b)  $[(12\text{-TMC})\text{Ni}^{\text{III}}(\text{O}_2)]^+$ , recorded in KBr pellet at 298 K (c)  $[(12\text{-TMC})\text{Ni}^{\text{II}}(\text{NO}_3^-)]^+$  prepared by reacting  $[(12\text{-TMC})\text{Ni}^{\text{II}}]^{2+}$  with  $\text{NaNO}_3$ , in KBr pellet at 298 K. (d) reaction mixture,  $[(12\text{-TMC})\text{Ni}^{\text{III}}(^{18}\text{O}_2)]^+ + \text{NO}$ , recorded after completion of reaction in KBr pellet at 298 K.

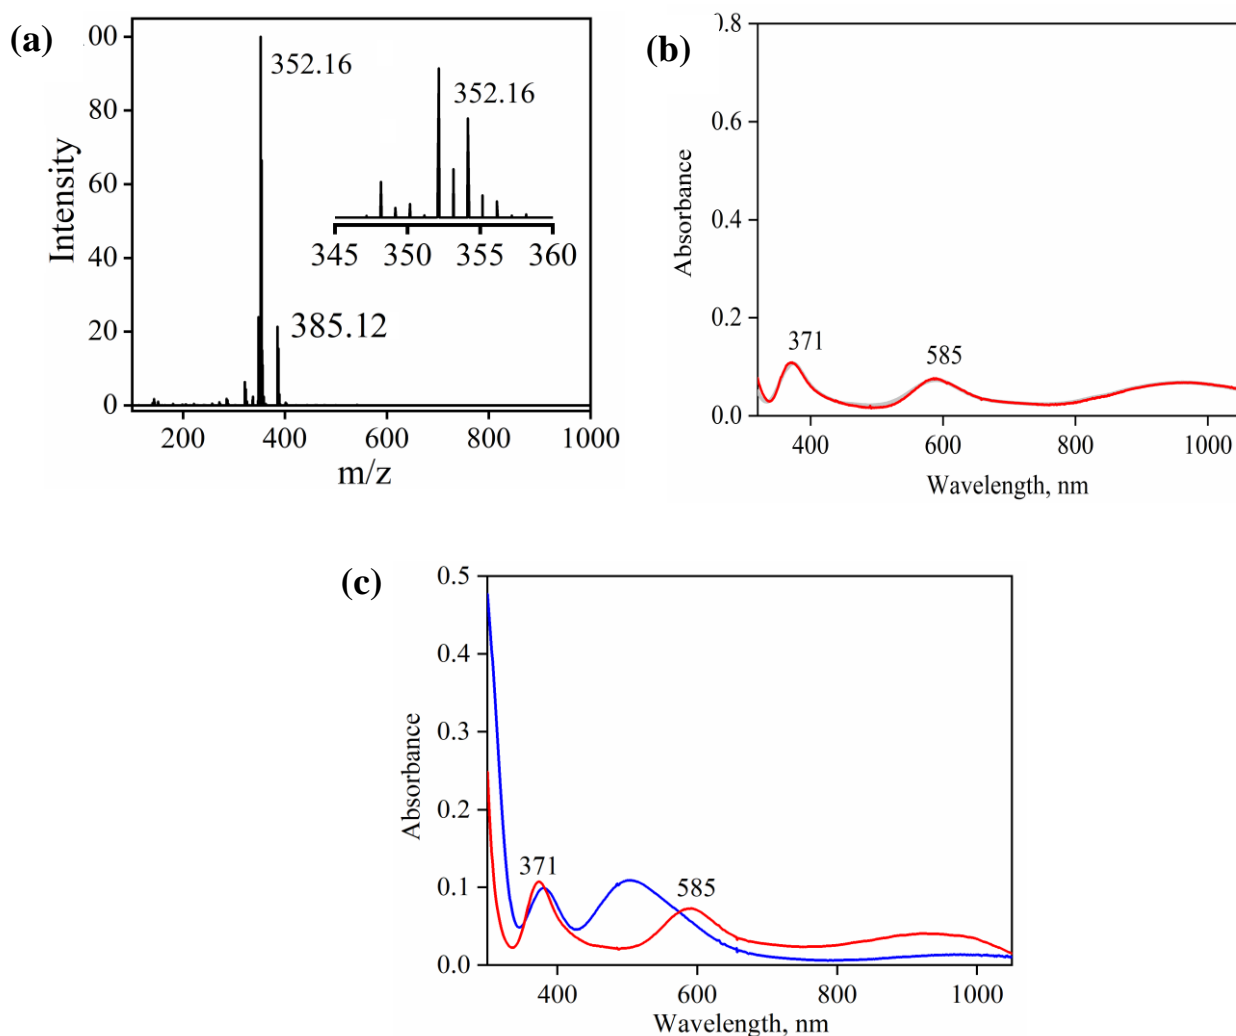

**Figure S4.** (a) ESI-MS spectrum of **3**, formed in the reaction of  $[(12\text{-TMC})\text{Ni}^{\text{III}}(^{18}\text{O}_2)]^+ + \text{NO}$ , recorded in  $\text{CH}_3\text{CN}$ . The peak at  $m/z$  352.16 and 385.12 are assigned to be  $[(12\text{-TMC})\text{Ni}^{\text{II}}(^{16}\text{ON}^{18}\text{O}_2)]^+$  (calcd:  $m/z$  352.16) and  $[(12\text{-TMC})\text{Ni}^{\text{II}}(\text{ClO}_4)]^+$  (calcd:  $m/z$  385.12), respectively. (b) UV-vis spectra of complex **3** prepared by reacting  $[(12\text{TMC})\text{Ni}^{\text{II}}]^+$  with  $\text{NaNO}_3$ , (0.5mM, grey line) and isolated from the reaction mixture of complex **1** with  $\text{NO}$  (0.5mM, red line) recorded in  $\text{CH}_3\text{CN}$  at 233 K. (c) UV-vis spectra of  $[(12\text{TMC})\text{Ni}^{\text{II}}]^{2+}$ , (0.5mM, blue line) and isolated from the reaction mixture of complex **1** with  $\text{NO}$  (0.5mM, red line) recorded in  $\text{CH}_3\text{CN}$  at 233 K.

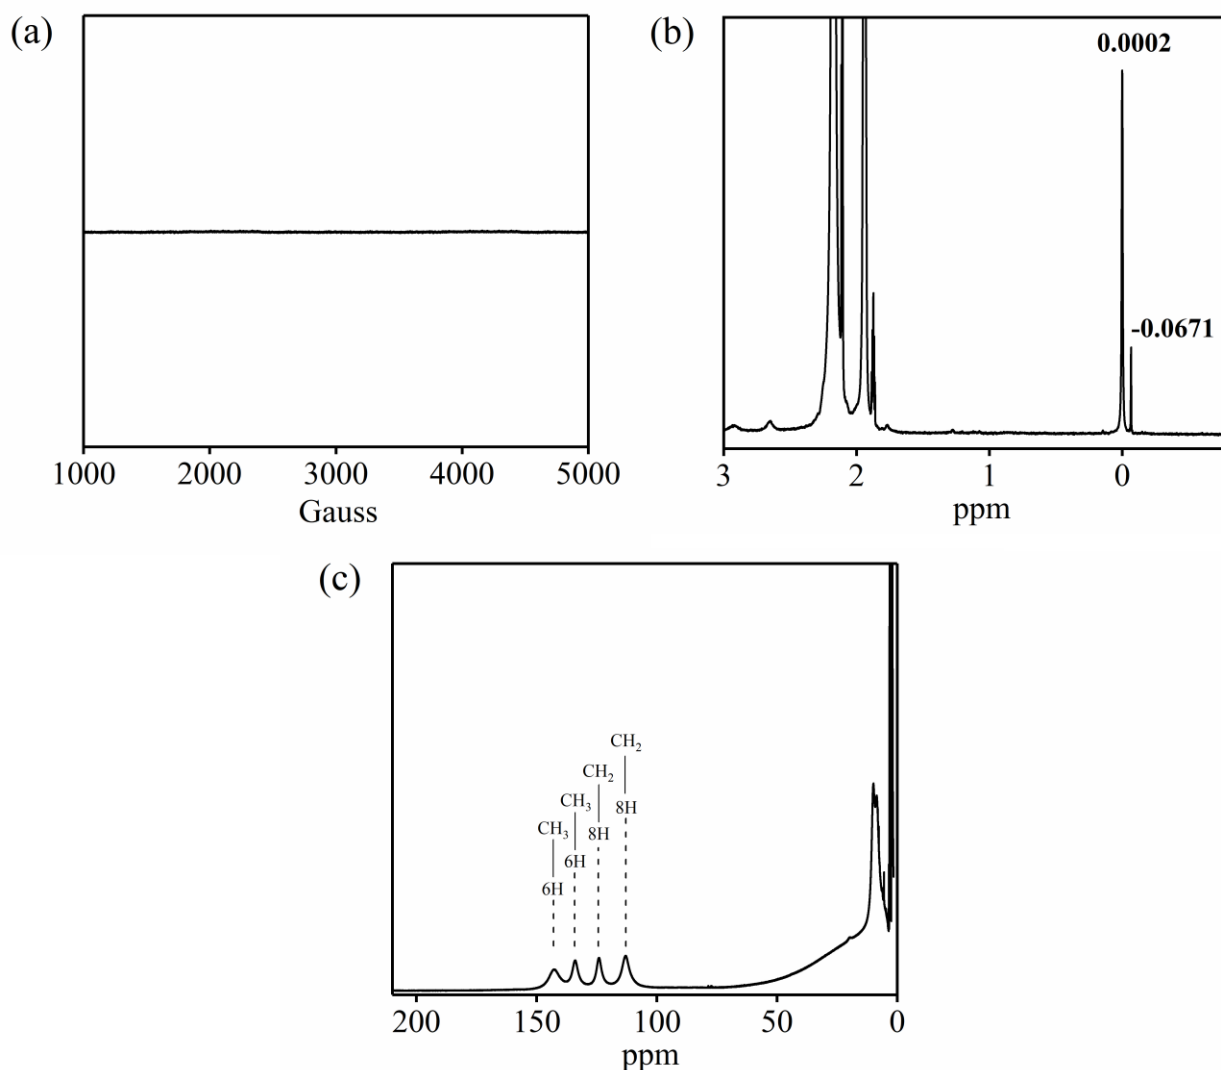

**Figure S5.** (a) X-band EPR spectrum of **3** (5.0 mM) recorded at 100 K. (b)  $^1\text{H}$ -NMR (400 MHz) spectra of isolated complex **3** (4 mM) in  $\text{CD}_3\text{CN}$  (0.1 % TMS), recorded in a coaxial NMR tube, with inside  $\text{CD}_3\text{CN}$  (1.0 % TMS) at RT. (c) Wide range  $^1\text{H}$ -NMR (400 MHz) spectra of isolated complex **3** (4 mM) in  $\text{CD}_3\text{CN}$ .

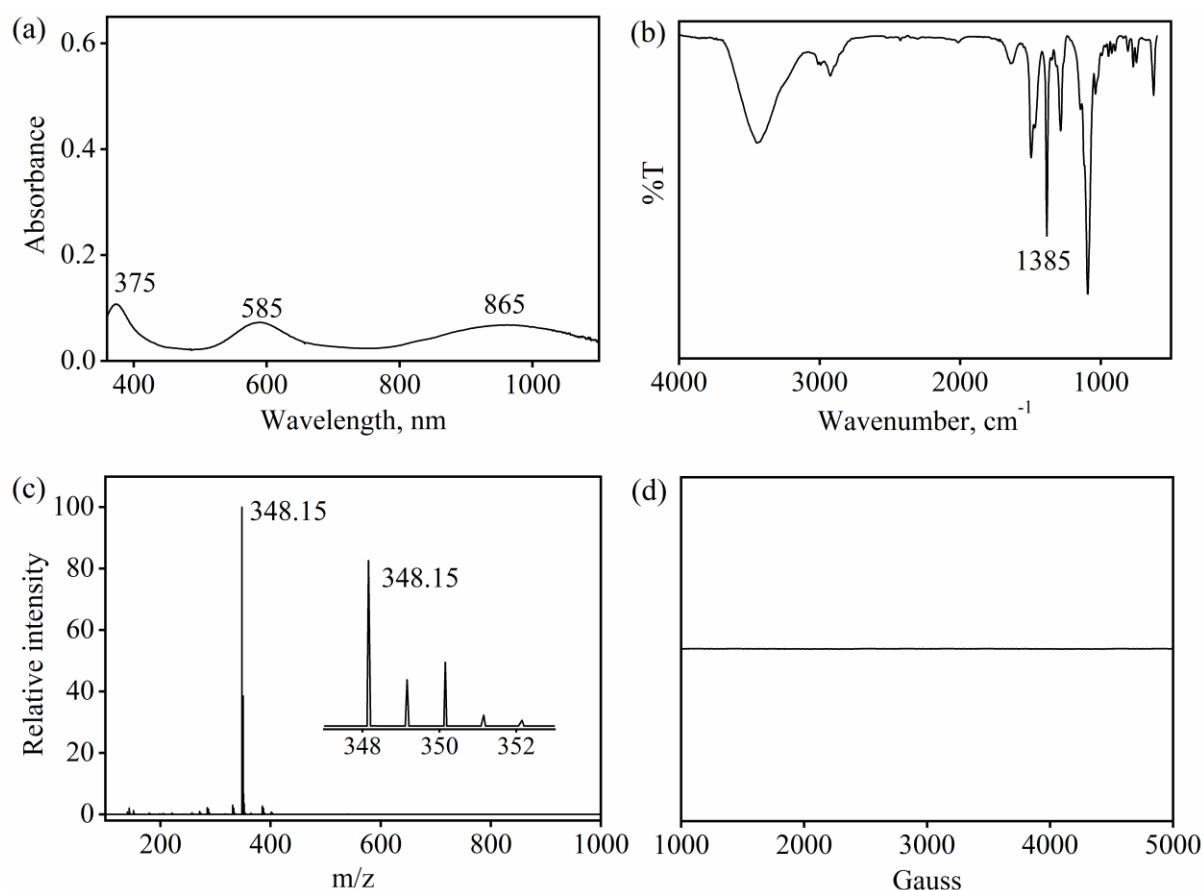

**Figure S6.** (a) UV-vis spectrum of  $[(12\text{-TMC})\text{Ni}^{\text{II}}(\text{NO}_3^-)](\text{ClO}_4)$  (0.50 mM), prepared by reacting  $[(12\text{TMC})\text{Ni}^{\text{II}}]^+$  with  $\text{NaNO}_3$ , recorded in  $\text{CH}_3\text{CN}$  at 233 K. Spectrum shows characteristic absorption band (375 nm, 585 nm and 865 nm) for  $[(12\text{-TMC})\text{Ni}^{\text{II}}(\text{NO}_3^-)](\text{ClO}_4)$ . (b) FT-IR spectrum of  $[(12\text{-TMC})\text{Ni}^{\text{II}}(\text{NO}_3^-)](\text{ClO}_4)$  recorded in KBr pellet at 298 K. The spectrum showed the peaks for aliphatic chain ( $2925\text{ cm}^{-1}$ ),  $\text{Ni}^{\text{II}}\text{NO}_3^-$  ( $1385\text{ cm}^{-1}$ ), and for  $\text{ClO}_4^-$  ( $1100\text{ cm}^{-1}$ ). (c) ESI-MS spectrum of  $[(12\text{-TMC})\text{Ni}^{\text{II}}(\text{NO}_3^-)](\text{ClO}_4)$  recorded in  $\text{CH}_3\text{CN}$ . The peak at  $m/z$  348.15 is assigned to be  $[(12\text{-TMC})\text{Ni}^{\text{II}}(\text{NO}_3^-)]^+$  (calcd:  $m/z$  348.15). (d) X-band EPR spectrum of  $[(12\text{-TMC})\text{Ni}^{\text{II}}(\text{NO}_3^-)](\text{ClO}_4)$  (5.0 mM) recorded at 100 K.

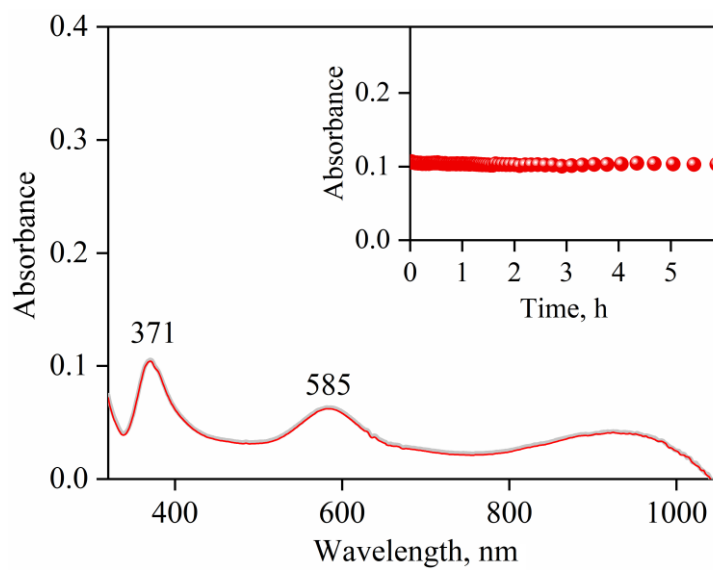

**Figure S7.** UV-vis spectra of natural decay of complex **3** recorded in CH<sub>3</sub>CN at 298 K. The Inset shows the time course of the natural decay of **3** (red circles) monitored at 371 nm.

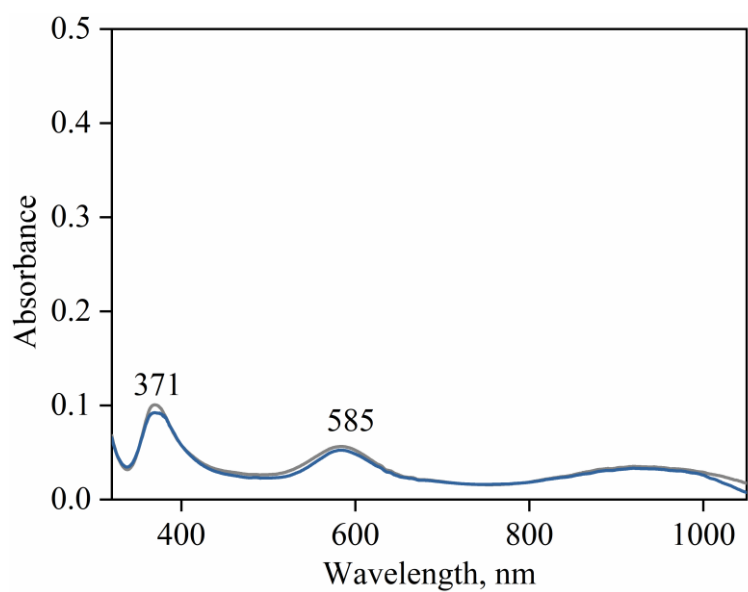

**Figure S8.** UV-vis spectra of 0.5mM pure isolated complex **3** (grey line) and complex **3** formed in the reaction of 0.5mM of complex **1** with NO (blue line).



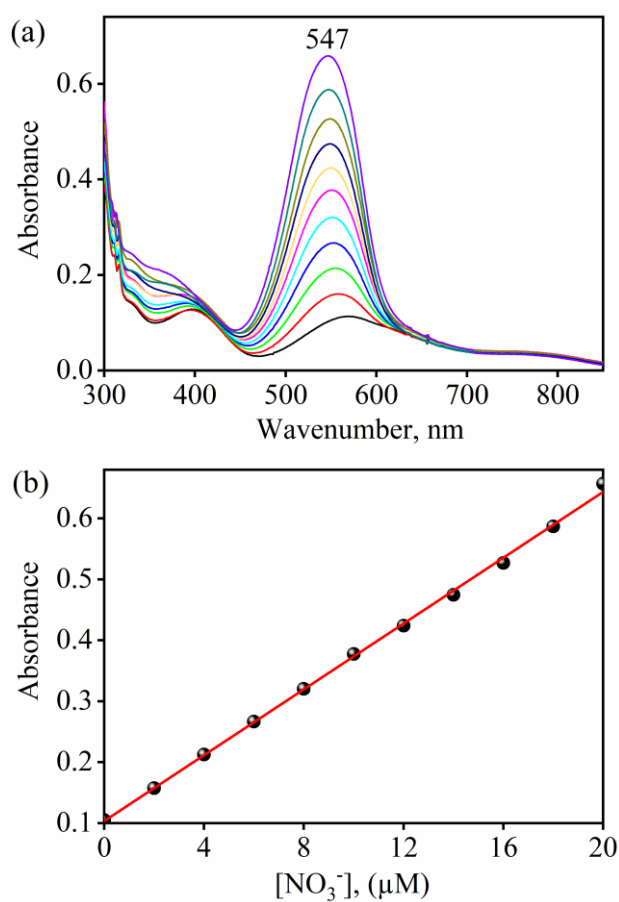

**Figure S9.** UV-vis spectral changes showing the increase in the absorbance at 547 nm (absorbance band due to the formation of azo dye) by addition of varying amounts of Griess reagent to  $\text{NaNO}_3$  solutions in various concentrations (0, 2.0, 4.0, 6.0, 8.0, 10, 12, 14, 16, 18, 20  $\mu\text{M}$ ) at 298 K. (b) Spectral calibration curve for the formation of peak at 547 nm as a function of equivalents of  $\text{NaNO}_3$  in increments of 0, 2.0, 4.0, 6.0, 8.0, 10, 12, 14, 16, 18, 20.

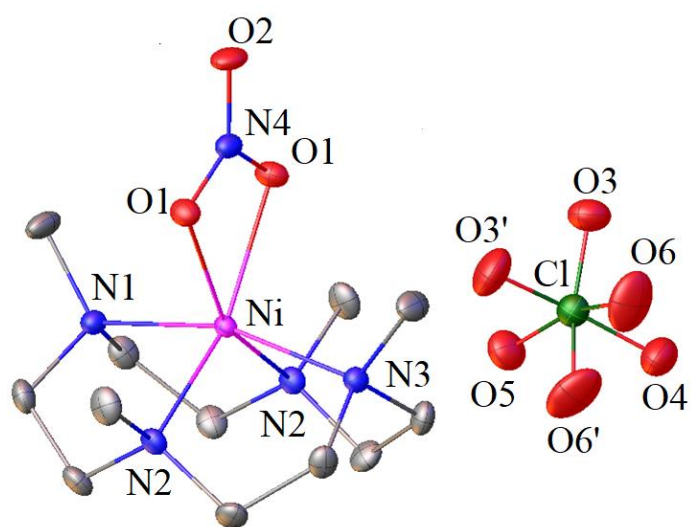

**Figure S10.** Displacement ellipsoid plots (30 % probability) of  $[(12\text{-TMC})\text{Ni}^{\text{II}}(\text{NO}_3)](\text{ClO}_4)$  (**3**) at 293 K. Disordered portions and the H atoms have been removed for clarity.

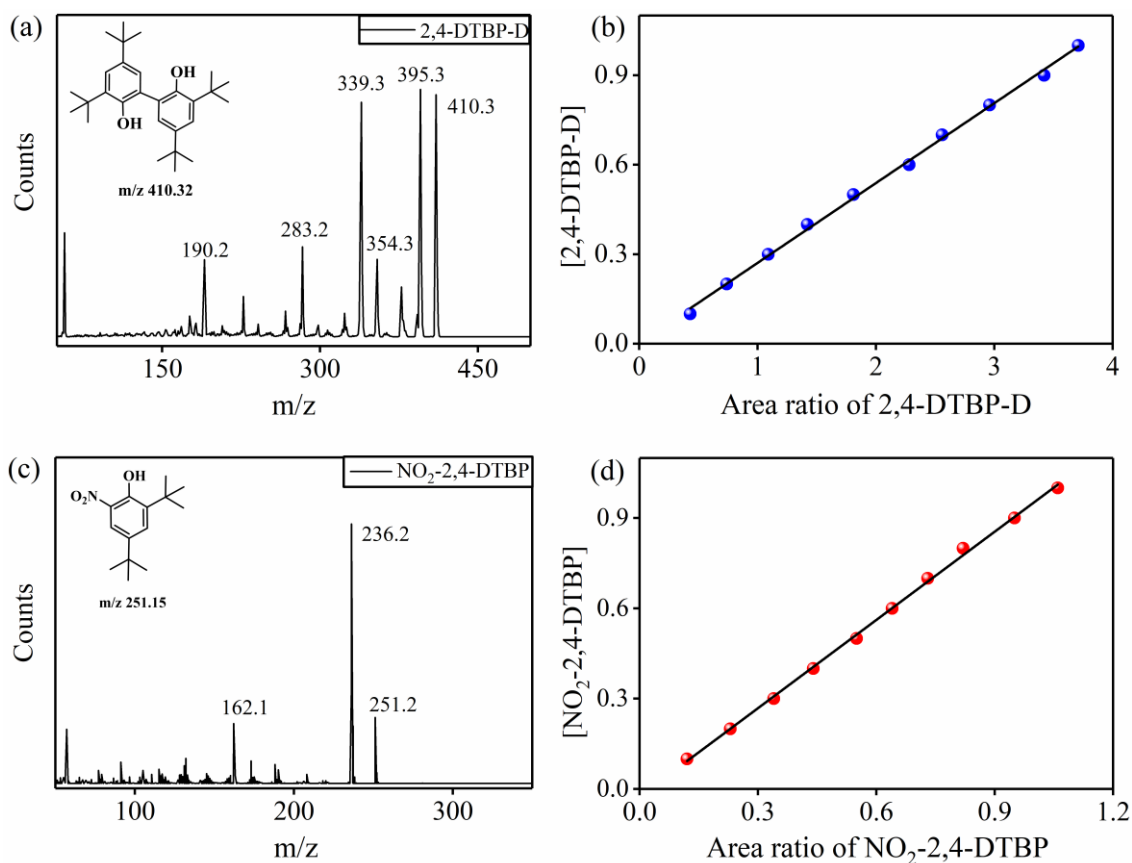

**Figure S11.** GC-MS characterisation of (a) 2,4-DTBP-dimer (2,4-DTBP-D); The peaks at  $m/z$  410.3, 395.3, 339.3 and 190.2 are assigned to be 2,4-DTBP-D, loss of CH<sub>3</sub> from 2,4-DTBP-D, loss of C<sub>4</sub>H<sub>8</sub> and CH<sub>3</sub> from 2,4-DTBP-D and loss of CH<sub>3</sub> from monomer 2,4-DTBP (b) Calibration plot for 2,4-DTBP-D. (c) nitro-2,4-DTBP (NO<sub>2</sub>-2,4-DTBP): The peaks at  $m/z$  251.2 and 236.2 are assigned to be nitro-2,4-DTBP and loss of CH<sub>3</sub> from nitro-2,4-DTBP. (d) Calibration plot for NO<sub>2</sub>-2,4-DTBP. The peaks were compared with the NIST standard library.

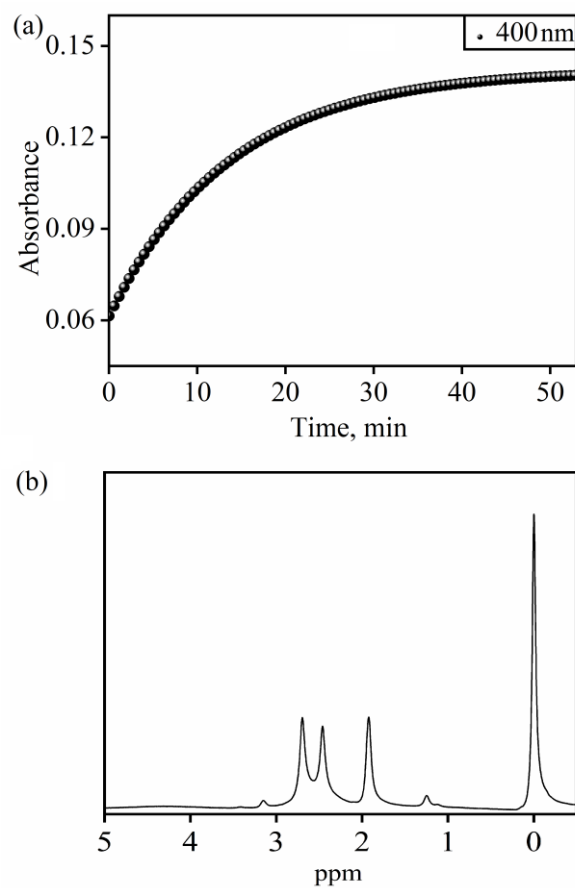

**Figure S12.** (a) Time course of the reaction of **3** (0.5mM) with 5eqv. H<sub>2</sub>O<sub>2</sub> + 2.5eqv. Et<sub>3</sub>N monitored at 400 nm in CH<sub>3</sub>CN at 233 K. (b) <sup>1</sup>H-NMR (400 MHz) spectra of product obtained in the reaction of **3** with H<sub>2</sub>O<sub>2</sub>/TEA in CD<sub>3</sub>CN at 298 K.

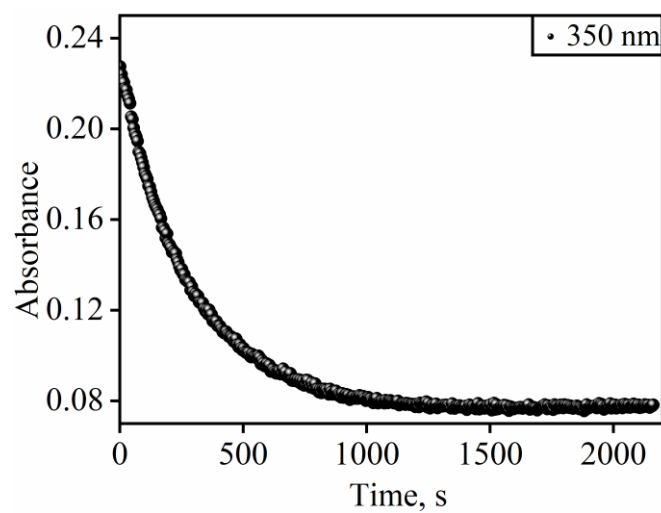

**Figure S13.** Time course of the reaction of **2** (0.5 mM) with NO monitored at 350 nm in CH<sub>3</sub>CN at 233 K.

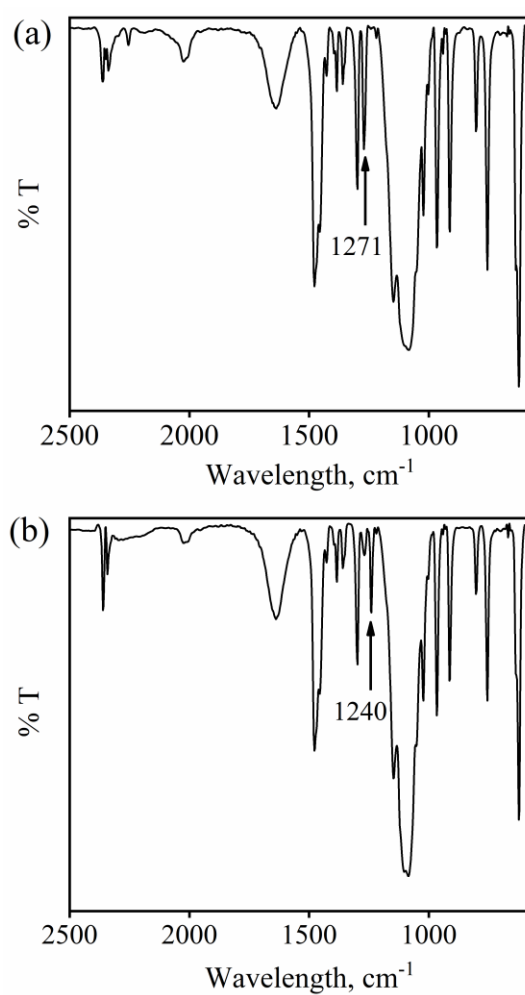

**Figure S14.** FT-IR spectrum of (a) reaction mixture,  $[(12\text{-TMC})\text{Co}^{\text{III}}(\text{O}_2)]^+ + \text{NO}$ , recorded after completion of reaction in KBr pellet at 298 K. (b)  $[(12\text{-TMC})\text{Co}^{\text{III}}(^{18}\text{O}_2)]^+ + \text{NO}$ , recorded in KBr pellet at 298 K

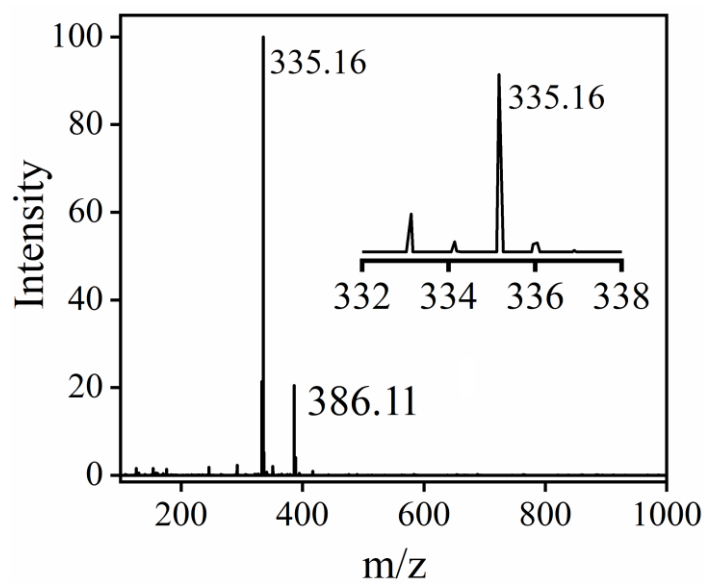

**Figure S15.** ESI-MS spectrum of **4**, formed in the reaction of  $[(12\text{-TMC})\text{Co}^{\text{III}}(^{18}\text{O}_2)]^+ + \text{NO}$ , recorded in  $\text{CH}_3\text{CN}$ . The peak at  $m/z$  335.16 and 386.11 are assigned to be  $[(12\text{-TMC})\text{Co}^{\text{II}}(^{16}\text{ON}^{18}\text{O})]^+$  (calcd:  $m/z$  335.16) and  $[(12\text{-TMC})\text{Co}^{\text{II}}(\text{ClO}_4)]^+$  (calcd:  $m/z$  386.11), respectively.

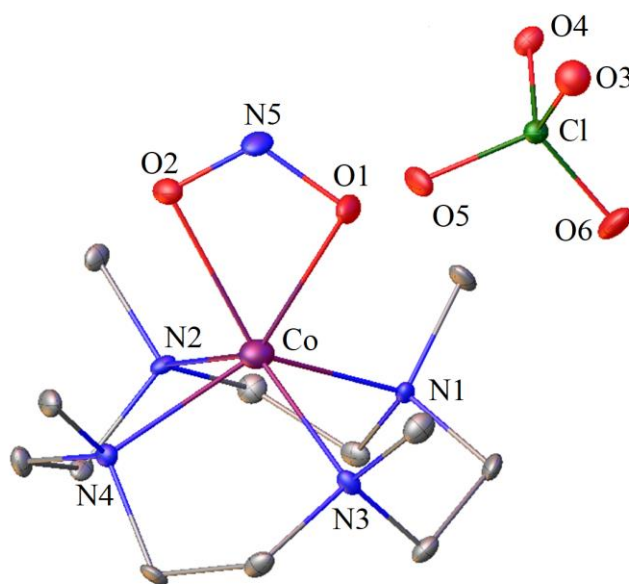

**Figure S16.** Displacement ellipsoid plots (30 % probability) of  $[(12\text{-TMC})\text{Co}^{\text{II}}(\text{NO}_2)](\text{ClO}_4)$  (**4**) at 293 K. Disordered portions and the H atoms have been removed for clarity.



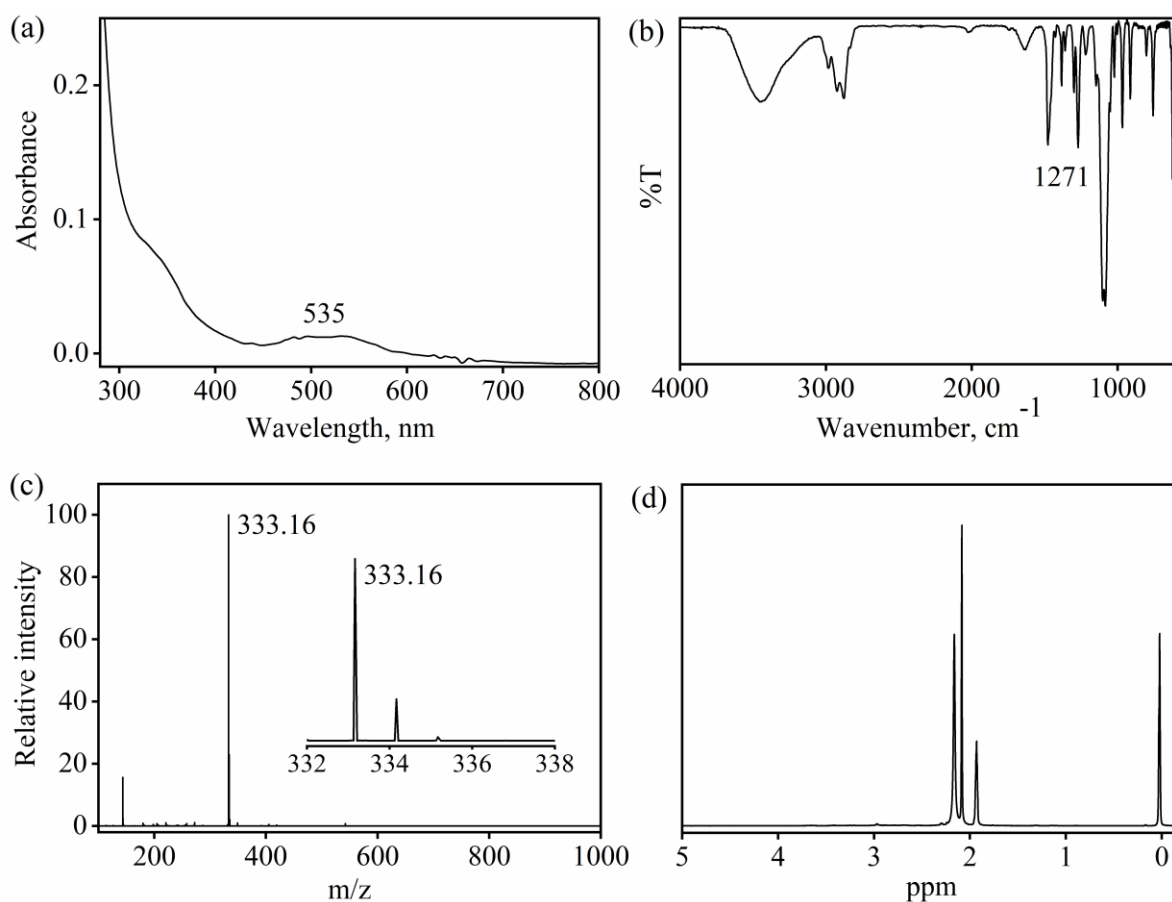

**Figure S17.** (a) UV-vis spectrum of  $[(12\text{-TMC})\text{Co}^{\text{II}}(\text{NO}_2^-)](\text{ClO}_4)$  (0.50 mM), prepared by reacting  $[(12\text{TMC})\text{Co}^{\text{II}}]^+$  with  $\text{NaNO}_2$ , recorded in  $\text{CH}_3\text{CN}$  at 233 K. Spectrum shows the characteristic absorption band at 535 nm for  $[(12\text{-TMC})\text{Co}^{\text{II}}(\text{NO}_2^-)](\text{ClO}_4)$ . (b) FT-IR spectrum of  $[(12\text{-TMC})\text{Co}^{\text{II}}(\text{NO}_2^-)](\text{ClO}_4)$  recorded in KBr pellet at 298 K. The spectrum showed the peaks for aliphatic chain ( $2925\text{ cm}^{-1}$ ),  $\text{Co}^{\text{II}}\text{NO}_2^-$  ( $1271\text{ cm}^{-1}$ ), and for  $\text{ClO}_4^-$  ( $1100\text{ cm}^{-1}$ ). (c) ESI-MS spectrum of  $[(12\text{-TMC})\text{Co}^{\text{II}}(\text{NO}_2^-)](\text{ClO}_4)$  recorded in  $\text{CH}_3\text{CN}$ . The peaks at  $m/z$  333.16 is assigned to be  $[(12\text{-TMC})\text{Co}^{\text{II}}(\text{NO}_2^-)]^+$  (calcd:  $m/z$  333.16). (d)  $^1\text{H}$ -NMR (400 MHz) spectra of complex  $[(12\text{-TMC})\text{Co}^{\text{II}}(\text{NO}_2^-)](\text{ClO}_4)$  (40 mM) in  $\text{CD}_3\text{CN}$  at RT.

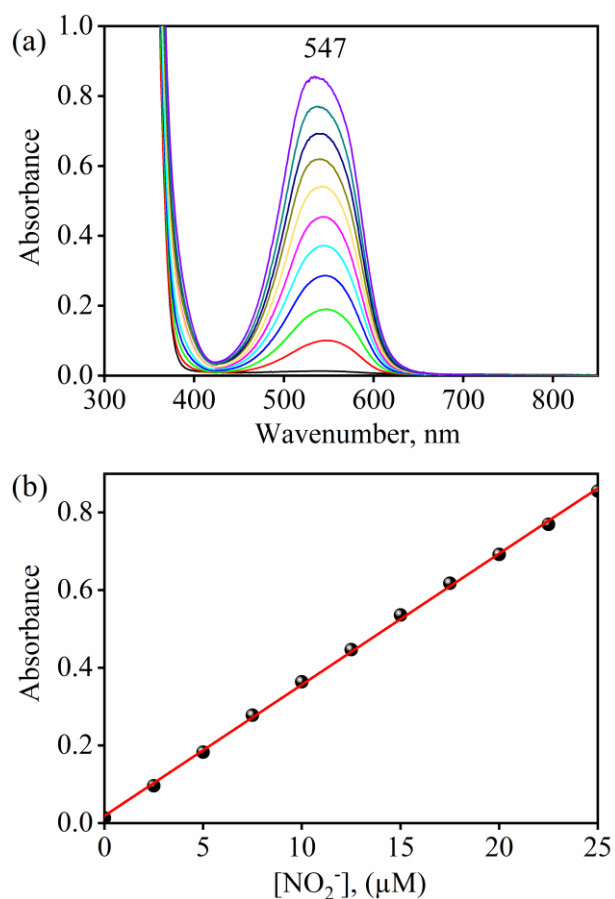

**Figure S18.** UV-vis spectral changes showing the increase in the absorbance at 547 nm (absorbance band due to the formation of azo dye) by addition of varying amounts of Griess reagent to  $\text{NaNO}_2$  solutions in various concentrations (0, 2.5, 5.0, 7.5, 10, 12.5, 15, 17.5, 20, 22.5, 25  $\mu\text{M}$ ) at 298 K. (b) Spectral calibration curve for the formation of peak at 547 nm as a function of equivalents of  $\text{NaNO}_2$  in increments of 0, 2.5, 5.0, 7.5, 10, 12.5, 15, 17.5, 20, 22.5, 25.

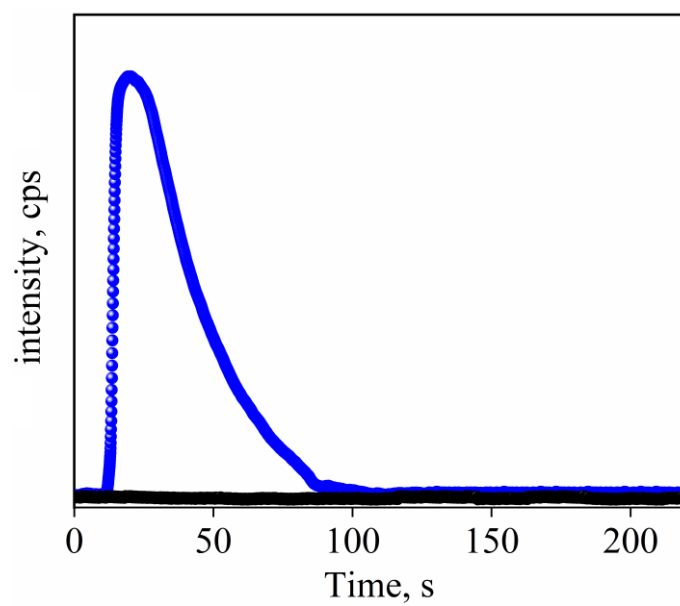

**Figure S19.** Mass spectra of formation of O<sub>2</sub> in the reaction of complex **2** (5.0 mM) with 1 equivalent of NO.

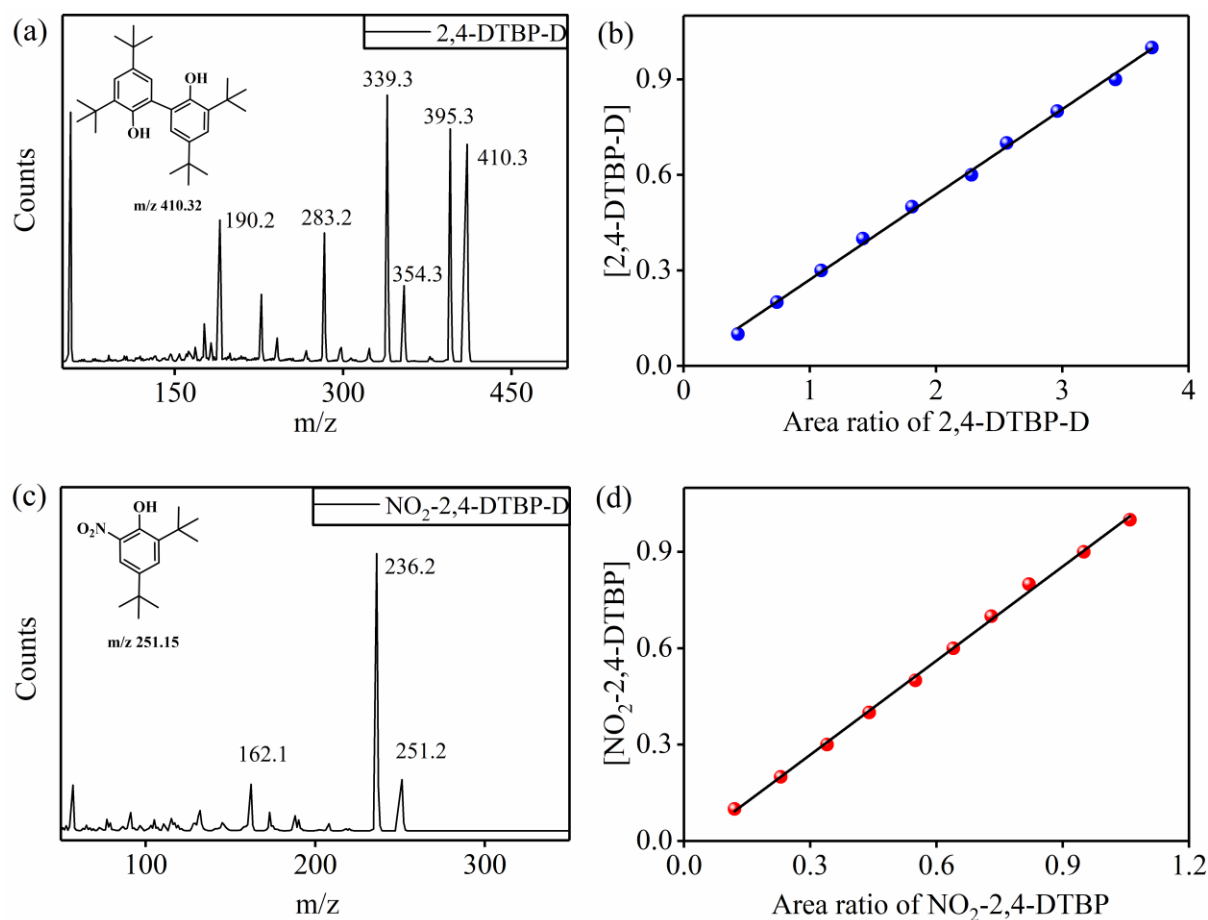

**Figure S20.** GC-MS characterisation of (a) 2,4-DTBP-D; The peaks at  $m/z$  410.3, 395.3, 354.3, 339.3, 283.2 and 190.2 are assigned to be 2,4-DTBP-D, loss of  $\text{CH}_3$  from 2,4-DTBP-D, loss of  $\text{C}_4\text{H}_8$  and  $\text{CH}_3$  from 2,4-DTBP-D and loss of  $\text{CH}_3$  from monomer 2,4-DTBP (b) Calibration plot for 2,4-DTBP-D. (c) nitro-2,4-DTBP: The peaks at  $m/z$  251.2, 162.1 and 236.2 are assigned to be nitro-2,4-DTBP and loss of  $\text{CH}_3$  from nitro-2,4-DTBP. (d) Calibration plot for nitro-2,4-DTBP. The peaks were compared with the NIST standard library.

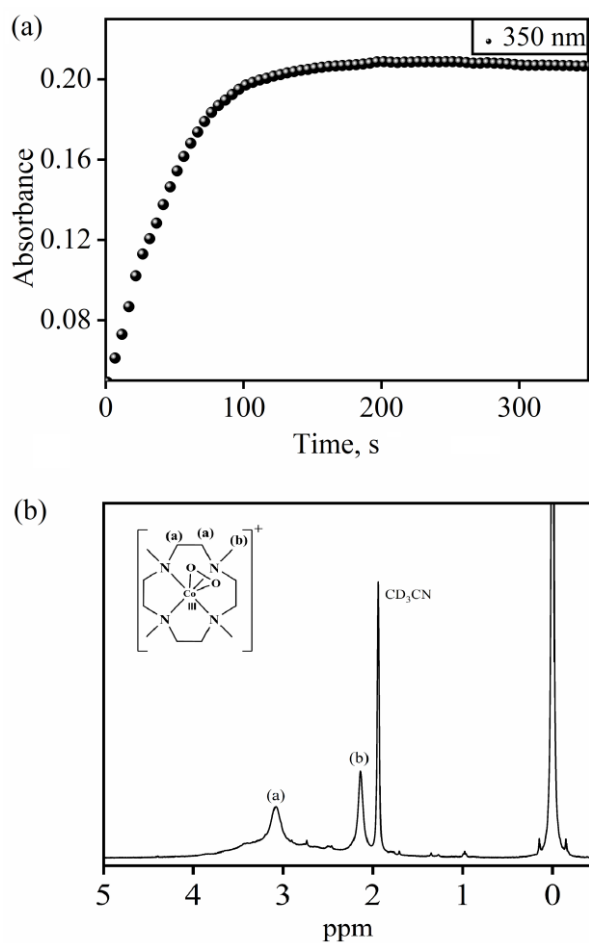

**Figure S21.** (a) Time course of the reaction of **4** (0.5mM) with 5eqv. H<sub>2</sub>O<sub>2</sub> + 2.5eqv. Et<sub>3</sub>N monitored at 350 nm in CH<sub>3</sub>CN at 233 K. (b) <sup>1</sup>H-NMR (400 MHz) spectra of product obtained in the reaction of **4** with H<sub>2</sub>O<sub>2</sub>/TEA in CD<sub>3</sub>CN at 298 K.

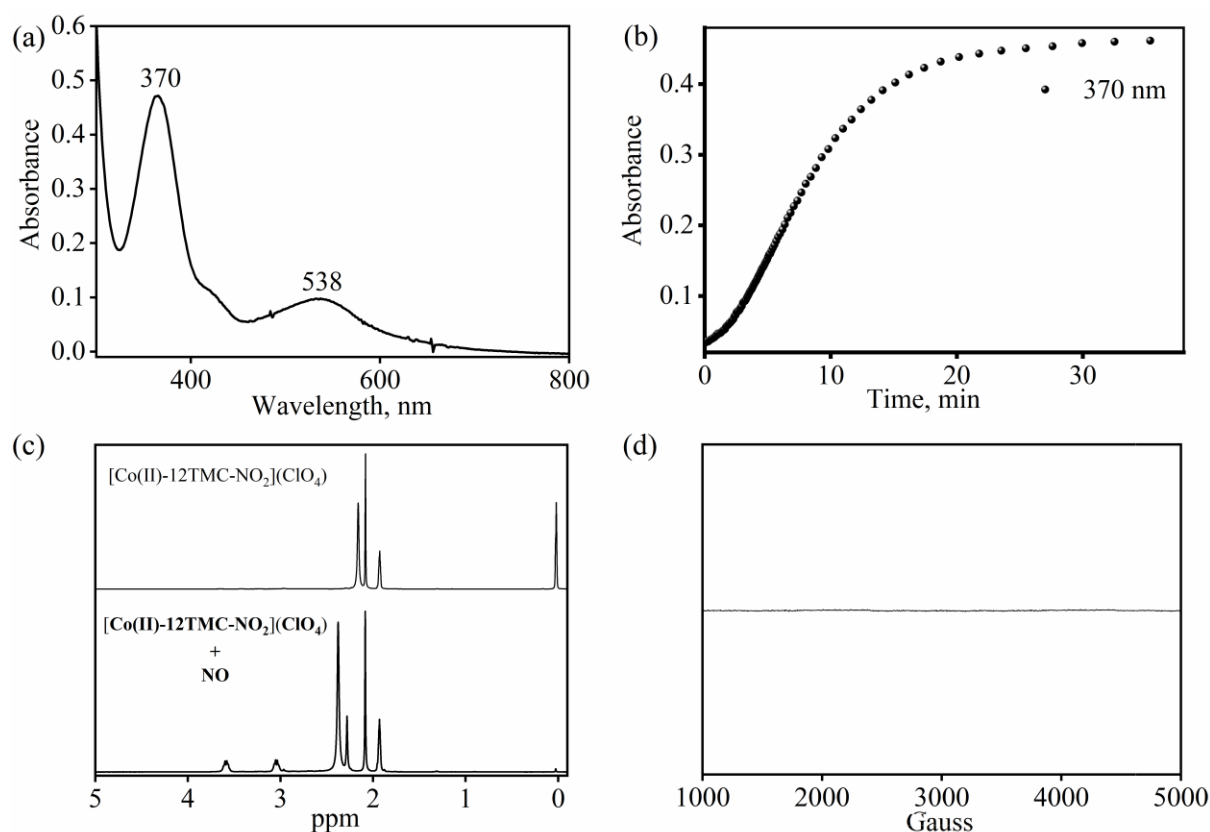

**Figure S22.** (a) UV-vis spectrum of complex **4** (0.50 mM),+ excess NO recorded in CH<sub>3</sub>CN at 233 K. Spectrum shows the characteristic absorption band at 370 nm for [(12-TMC)Co<sup>II</sup>(NO)]<sup>2+</sup>. (b) Time course of the reaction of **4** (0.5 mM) with excess NO monitored at 370 nm in CH<sub>3</sub>CN at 233 K. (c) <sup>1</sup>H NMR spectra of complex **4** and after the reaction of complex **4** + excess NO recorded in CD<sub>3</sub>CN at RT. (d) X-band EPR spectrum of isolated product of complex **4** + excess NO recorded at 100 K.

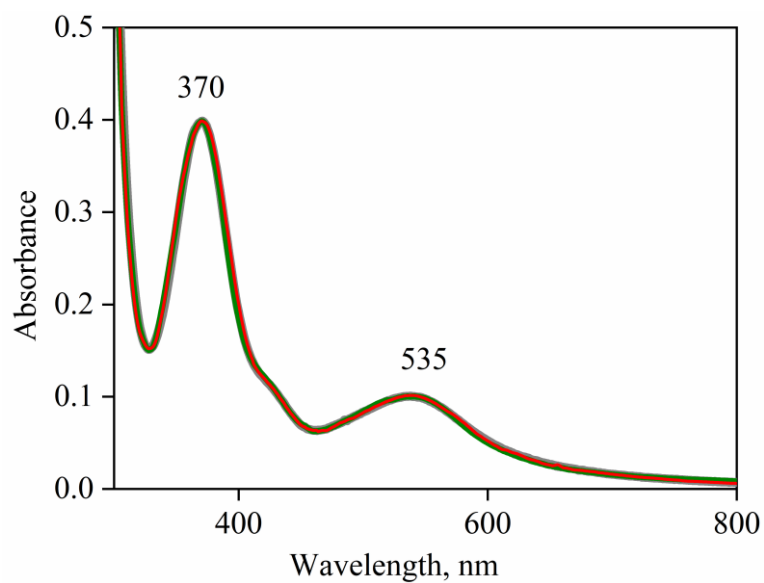

**Figure S23.** UV-vis spectra of 0.5mM complex **5** with different anions.  $[(12\text{-TMC})\text{Co}^{\text{II}}(\text{NO})](\text{ClO}_4)_2$  (grey line),  $[(12\text{-TMC})\text{Co}^{\text{II}}(\text{NO})](\text{BF}_4)_2$  (green line),  $[(12\text{-TMC})\text{Co}^{\text{II}}(\text{NO})](\text{BPh}_4)_2$  (red line).

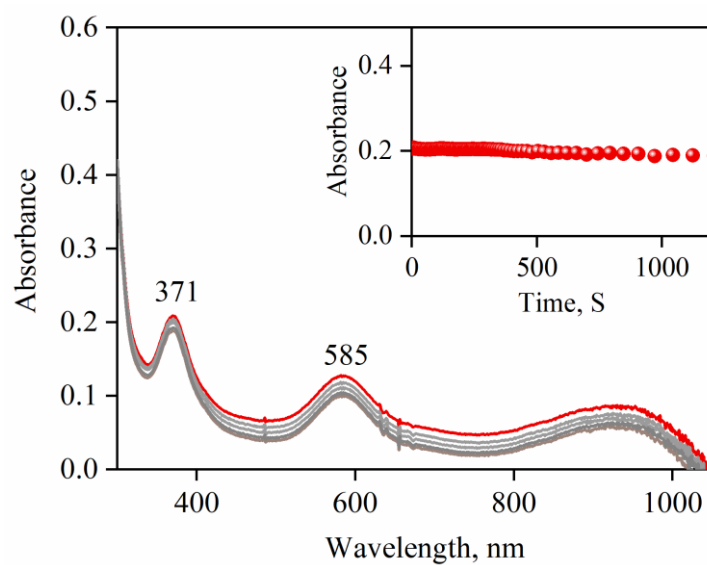

**Figure S24.** UV-vis spectra for the complex **3** with NO. The Inset shows the time course of the natural decay of **3** (red circles) monitored at 371 nm in CH<sub>3</sub>CN at 233 K.
